# Supplementary material for: TD-DFT study on fluoride-sensing mechanism of 2-(2′-phenylureaphenyl)benzoxazole: the way to inhibit the ESIPT process
Source: Royal Society of Chemistry journal article supplement (doi:10.1039/c1cp21470e), 2011-01-01
Supplement: c1cp21470e.pdf [file c1cp21470e.pdf]

Supporting Information

## Fluoride-Sensing Mechanism of 2-(2'-phenylureaphenyl)benzoxazole

Guang-Yue Li, Tian-Shu Chu\*

### 1. Initial Configurations for PUBO-F

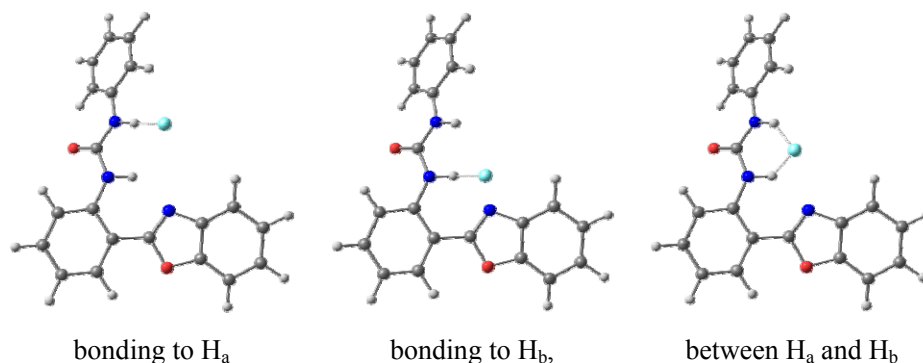

**Fig. S1** A set of initial configurations with different fluoride position for PUBO-F optimization.  
gray: C; white: H; red: O; blue: N; cyan: F.

### 2. XYZ coordinates (angstrom) and SCF energies (AU)

Calculated using **Gaussian 09** program

**Note:** upper case letters before the atomic coordinates indicate the atomic symbol of the atoms involved in the calculations.

#### PUBO in the S<sub>0</sub> state

E = -1089.36816866

|   |           |           |           |
|---|-----------|-----------|-----------|
| C | -1.855683 | 2.340705  | -0.004356 |
| C | -0.648381 | 1.656250  | -0.006411 |
| C | -0.595566 | 0.257091  | -0.007623 |
| C | -1.750122 | -0.518379 | -0.006816 |
| C | -2.935768 | 0.184093  | -0.004776 |
| C | -3.015512 | 1.574957  | -0.003540 |
| N | -4.355364 | 1.928774  | -0.001595 |
| C | -5.011608 | 0.805133  | -0.001589 |
| O | -4.213098 | -0.303211 | -0.003555 |
| C | -6.445078 | 0.602535  | -0.000156 |
| C | -6.936967 | -0.707975 | -0.000347 |
| C | -8.292116 | -0.967399 | 0.000813  |
| C | -9.181790 | 0.101119  | 0.002200  |
| C | -8.728428 | 1.408222  | 0.002433  |
| C | -7.357635 | 1.691677  | 0.001276  |

|   |            |           |           |
|---|------------|-----------|-----------|
| N | -6.847925  | 2.980511  | 0.001520  |
| C | -7.534313  | 4.174668  | 0.002523  |
| N | -6.683263  | 5.249772  | 0.003221  |
| C | -6.997825  | 6.613395  | 0.003807  |
| C | -8.298757  | 7.122646  | 0.003552  |
| C | -8.498029  | 8.497933  | 0.004097  |
| C | -7.428358  | 9.381839  | 0.004889  |
| C | -6.134407  | 8.872261  | 0.005130  |
| C | -5.918570  | 7.505161  | 0.004594  |
| O | -8.755290  | 4.272395  | 0.002942  |
| H | -1.896657  | 3.422600  | -0.003432 |
| H | 0.278759   | 2.216392  | -0.007121 |
| H | 0.368890   | -0.235726 | -0.009242 |
| H | -1.719011  | -1.600002 | -0.007733 |
| H | -6.230420  | -1.527205 | -0.001446 |
| H | -8.651724  | -1.988418 | 0.000641  |
| H | -10.250007 | -0.081712 | 0.003121  |
| H | -9.427162  | 2.228838  | 0.003500  |
| H | -5.824324  | 3.014765  | 0.000749  |
| H | -5.692775  | 5.051479  | 0.003376  |
| H | -9.139681  | 6.447707  | 0.002949  |
| H | -9.513677  | 8.876867  | 0.003888  |
| H | -7.597750  | 10.451653 | 0.005308  |
| H | -5.283039  | 9.542916  | 0.005736  |
| H | -4.905772  | 7.116273  | 0.004771  |

**PUBO in the S<sub>1</sub> state**

E = -1089.24856942

|   |           |           |           |
|---|-----------|-----------|-----------|
| C | -1.942718 | 2.470468  | -0.003906 |
| C | -0.712698 | 1.824567  | -0.005427 |
| C | -0.606551 | 0.429769  | -0.006271 |
| C | -1.746640 | -0.385729 | -0.005601 |
| C | -2.955357 | 0.265080  | -0.004098 |
| C | -3.094124 | 1.670866  | -0.003217 |
| N | -4.413518 | 1.983088  | -0.001741 |
| C | -5.073742 | 0.808387  | -0.001719 |
| O | -4.202943 | -0.281804 | -0.003150 |
| C | -6.453969 | 0.571783  | -0.000676 |
| C | -6.969140 | -0.747364 | -0.000898 |
| C | -8.327244 | -0.990488 | 0.000223  |
| C | -9.254088 | 0.063191  | 0.001669  |
| C | -8.797616 | 1.374842  | 0.001938  |
| C | -7.431010 | 1.657714  | 0.000801  |
| N | -6.914281 | 2.932272  | 0.000811  |

|   |            |           |           |
|---|------------|-----------|-----------|
| C | -7.581913  | 4.129973  | 0.002719  |
| N | -6.680633  | 5.182615  | 0.001568  |
| C | -6.942060  | 6.534974  | 0.003000  |
| C | -8.235887  | 7.087378  | 0.006658  |
| C | -8.383655  | 8.461829  | 0.007923  |
| C | -7.276185  | 9.305252  | 0.005621  |
| C | -5.993434  | 8.757795  | 0.001996  |
| C | -5.822557  | 7.391289  | 0.000698  |
| O | -8.795758  | 4.267015  | 0.004992  |
| H | -2.015685  | 3.550787  | -0.003265 |
| H | 0.194342   | 2.418026  | -0.005990 |
| H | 0.373494   | -0.031074 | -0.007461 |
| H | -1.677882  | -1.466021 | -0.006231 |
| H | -6.273670  | -1.575622 | -0.001977 |
| H | -8.679146  | -2.015712 | -0.000004 |
| H | -10.317104 | -0.138491 | 0.002535  |
| H | -9.492755  | 2.199704  | 0.003017  |
| H | -5.872878  | 2.945017  | -0.000407 |
| H | -5.696348  | 4.943504  | -0.000773 |
| H | -9.095438  | 6.436865  | 0.008449  |
| H | -9.381779  | 8.882556  | 0.010768  |
| H | -7.409416  | 10.379817 | 0.006641  |
| H | -5.124971  | 9.404796  | 0.000185  |
| H | -4.827242  | 6.961683  | -0.002099 |

**ESIPT structure of PUBO in the S<sub>1</sub> state**

E = -1089.27523695

|   |           |           |           |
|---|-----------|-----------|-----------|
| C | -1.825374 | 2.399344  | 0.097003  |
| C | -0.620578 | 1.698449  | 0.106415  |
| C | -0.576505 | 0.305684  | 0.089254  |
| C | -1.747572 | -0.460162 | 0.061194  |
| C | -2.927426 | 0.242324  | 0.051512  |
| C | -2.986977 | 1.639312  | 0.069251  |
| N | -4.319758 | 1.949007  | 0.062780  |
| C | -5.060143 | 0.811758  | 0.022113  |
| O | -4.203780 | -0.257727 | 0.025837  |
| C | -6.457293 | 0.621002  | -0.029706 |
| C | -6.969799 | -0.683958 | -0.011715 |
| C | -8.342466 | -0.926732 | -0.080329 |
| C | -9.237383 | 0.127681  | -0.152262 |
| C | -8.755441 | 1.443051  | -0.149741 |
| C | -7.388678 | 1.732624  | -0.082623 |
| N | -6.829308 | 2.984467  | -0.118601 |
| C | -7.549440 | 4.109759  | 0.083606  |

|   |            |           |           |
|---|------------|-----------|-----------|
| N | -6.716230  | 5.215999  | -0.123598 |
| C | -6.996820  | 6.557667  | -0.052735 |
| C | -8.255857  | 7.081527  | 0.295311  |
| C | -8.432596  | 8.452933  | 0.343961  |
| C | -7.388240  | 9.325379  | 0.054119  |
| C | -6.140169  | 8.808838  | -0.292086 |
| C | -5.942062  | 7.446051  | -0.346959 |
| O | -8.733919  | 4.249791  | 0.410431  |
| H | -1.857006  | 3.480552  | 0.110645  |
| H | 0.308388   | 2.255319  | 0.127786  |
| H | 0.381821   | -0.198098 | 0.097793  |
| H | -1.728478  | -1.541797 | 0.046389  |
| H | -6.285028  | -1.519278 | 0.053845  |
| H | -8.697742  | -1.950475 | -0.072052 |
| H | -10.303313 | -0.053771 | -0.207623 |
| H | -9.446216  | 2.270257  | -0.202948 |
| H | -4.797297  | 2.846195  | 0.028470  |
| H | -5.774349  | 4.975431  | -0.400910 |
| H | -9.065374  | 6.405265  | 0.519057  |
| H | -9.405199  | 8.847587  | 0.613067  |
| H | -7.542919  | 10.396371 | 0.096201  |
| H | -5.318754  | 9.477155  | -0.520429 |
| H | -4.972180  | 7.042516  | -0.615487 |

**PUBO-a1 in the S<sub>0</sub> state**

E = -1088.87430011

|   |           |           |           |
|---|-----------|-----------|-----------|
| C | -1.695538 | 1.971686  | 0.838828  |
| C | -0.529877 | 1.257062  | 0.595111  |
| C | -0.555382 | -0.006985 | -0.005630 |
| C | -1.751167 | -0.609645 | -0.385025 |
| C | -2.893844 | 0.119481  | -0.131995 |
| C | -2.896924 | 1.379971  | 0.463286  |
| N | -4.207403 | 1.818036  | 0.568214  |
| C | -4.930509 | 0.866316  | 0.060746  |
| O | -4.189114 | -0.209875 | -0.393191 |
| C | -6.370011 | 0.722396  | -0.047343 |
| C | -6.887859 | -0.582506 | -0.050558 |
| C | -8.244492 | -0.825546 | -0.107064 |
| C | -9.115373 | 0.263560  | -0.177581 |
| C | -8.631827 | 1.554119  | -0.189512 |
| C | -7.245428 | 1.846656  | -0.140313 |
| N | -6.739417 | 3.099161  | -0.293303 |
| C | -7.395540 | 4.184005  | 0.128064  |
| N | -6.823503 | 5.346614  | -0.405506 |

|   |            |           |           |
|---|------------|-----------|-----------|
| C | -7.148953  | 6.679493  | -0.219430 |
| C | -8.197283  | 7.134578  | 0.592740  |
| C | -8.446289  | 8.496143  | 0.709440  |
| C | -7.676869  | 9.435227  | 0.034963  |
| C | -6.635591  | 8.987086  | -0.772236 |
| C | -6.373834  | 7.634310  | -0.899403 |
| O | -8.353512  | 4.267835  | 0.925587  |
| H | -1.673858  | 2.949813  | 1.303444  |
| H | 0.424534   | 1.686632  | 0.875085  |
| H | 0.376987   | -0.530612 | -0.178621 |
| H | -1.780682  | -1.587241 | -0.848720 |
| H | -6.197970  | -1.414405 | 0.015953  |
| H | -8.621668  | -1.840575 | -0.096150 |
| H | -10.186334 | 0.097590  | -0.229922 |
| H | -9.321081  | 2.383841  | -0.263085 |
| H | -6.044061  | 5.162484  | -1.019347 |
| H | -8.801366  | 6.413918  | 1.121663  |
| H | -9.263059  | 8.823043  | 1.343822  |
| H | -7.882027  | 10.494139 | 0.134756  |
| H | -6.018363  | 9.697689  | -1.310538 |
| H | -5.558810  | 7.298408  | -1.532030 |

**PUBO-a2 in the  $S_0$  state**

E = -1088.87881054

|   |           |           |           |
|---|-----------|-----------|-----------|
| C | -1.829800 | 2.301966  | -0.003821 |
| C | -0.629673 | 1.603508  | -0.006432 |
| C | -0.593299 | 0.204379  | -0.008316 |
| C | -1.758544 | -0.556331 | -0.007638 |
| C | -2.935949 | 0.159758  | -0.005038 |
| C | -2.999831 | 1.551673  | -0.003133 |
| N | -4.333943 | 1.925379  | -0.000713 |
| C | -5.007674 | 0.810348  | -0.001202 |
| O | -4.217536 | -0.311721 | -0.003789 |
| C | -6.438552 | 0.613499  | 0.000403  |
| C | -6.930399 | -0.700120 | 0.000094  |
| C | -8.282146 | -0.967447 | 0.001335  |
| C | -9.175488 | 0.103253  | 0.002938  |
| C | -8.728645 | 1.408504  | 0.003315  |
| C | -7.352796 | 1.710427  | 0.002077  |
| N | -6.868997 | 2.989089  | 0.002479  |
| C | -7.545127 | 4.234408  | 0.003425  |
| N | -6.654740 | 5.223485  | 0.003827  |
| C | -7.015821 | 6.553809  | 0.004501  |
| C | -8.321246 | 7.097247  | 0.003822  |

|   |            |           |           |
|---|------------|-----------|-----------|
| C | -8.525354  | 8.471967  | 0.004460  |
| C | -7.460584  | 9.364562  | 0.005835  |
| C | -6.165466  | 8.850152  | 0.006528  |
| C | -5.951088  | 7.483665  | 0.005877  |
| O | -8.794325  | 4.264928  | 0.003873  |
| H | -1.857576  | 3.384413  | -0.002370 |
| H | 0.303835   | 2.153160  | -0.007052 |
| H | 0.364935   | -0.300578 | -0.010355 |
| H | -1.740455  | -1.638385 | -0.009065 |
| H | -6.220809  | -1.516968 | -0.001162 |
| H | -8.638644  | -1.989644 | 0.001078  |
| H | -10.243584 | -0.083826 | 0.003938  |
| H | -9.423465  | 2.233369  | 0.004534  |
| H | -5.855868  | 3.072725  | 0.001848  |
| H | -9.165282  | 6.424735  | 0.002800  |
| H | -9.543154  | 8.849440  | 0.003878  |
| H | -7.632441  | 10.434486 | 0.006335  |
| H | -5.314065  | 9.522872  | 0.007592  |
| H | -4.939605  | 7.091413  | 0.006396  |

**PUBO-a2 in the S<sub>1</sub> state**

E = -1088.79238652

|   |           |           |           |
|---|-----------|-----------|-----------|
| C | -2.251933 | 2.914608  | -0.130835 |
| C | -1.009068 | 2.386079  | 0.222039  |
| C | -0.866656 | 1.077937  | 0.676624  |
| C | -1.982697 | 0.232975  | 0.796521  |
| C | -3.196525 | 0.769917  | 0.445668  |
| C | -3.370823 | 2.085826  | -0.016433 |
| N | -4.695430 | 2.298885  | -0.275675 |
| C | -5.320328 | 1.144137  | 0.020250  |
| O | -4.421576 | 0.165519  | 0.472118  |
| C | -6.681166 | 0.810230  | -0.060609 |
| C | -7.136312 | -0.491876 | 0.302824  |
| C | -8.465336 | -0.842578 | 0.232162  |
| C | -9.423538 | 0.078380  | -0.202908 |
| C | -9.015555 | 1.366165  | -0.565656 |
| C | -7.685648 | 1.744956  | -0.505829 |
| N | -7.232808 | 3.027916  | -0.860028 |
| C | -7.922563 | 4.094238  | -1.300823 |
| N | -7.106468 | 5.176849  | -1.660414 |
| C | -6.870666 | 6.137310  | -0.767914 |
| C | -7.331878 | 6.116151  | 0.582464  |
| C | -7.025112 | 7.148108  | 1.437549  |
| C | -6.257785 | 8.229173  | 0.998061  |

|   |            |           |           |
|---|------------|-----------|-----------|
| C | -5.794652  | 8.273201  | -0.320084 |
| C | -6.093315  | 7.254984  | -1.191364 |
| O | -9.141214  | 4.158884  | -1.477772 |
| H | -2.347297  | 3.934330  | -0.483647 |
| H | -0.129111  | 3.014290  | 0.139960  |
| H | 0.114219   | 0.702640  | 0.941237  |
| H | -1.890252  | -0.787053 | 1.148385  |
| H | -6.406656  | -1.215739 | 0.641462  |
| H | -8.765037  | -1.844968 | 0.518428  |
| H | -10.470099 | -0.191720 | -0.260658 |
| H | -9.741494  | 2.091490  | -0.901941 |
| H | -6.213184  | 3.143403  | -0.768656 |
| H | -7.926382  | 5.279856  | 0.928250  |
| H | -7.380371  | 7.122801  | 2.460367  |
| H | -6.022001  | 9.035429  | 1.680527  |
| H | -5.200399  | 9.114684  | -0.653957 |
| H | -5.746086  | 7.270184  | -2.216590 |

**ESIPT structure of PUBO-a2 in the S<sub>1</sub> state**

E = -1088.77781834

|   |           |           |           |
|---|-----------|-----------|-----------|
| C | -2.257446 | 2.935275  | -0.141148 |
| C | -1.010306 | 2.415610  | 0.215764  |
| C | -0.862134 | 1.111509  | 0.672861  |
| C | -1.967806 | 0.257255  | 0.794944  |
| C | -3.185998 | 0.780519  | 0.441667  |
| C | -3.351228 | 2.090703  | -0.020017 |
| N | -4.690778 | 2.234525  | -0.265496 |
| C | -5.340412 | 1.069611  | 0.028102  |
| O | -4.407487 | 0.152033  | 0.471206  |
| C | -6.699815 | 0.777462  | -0.062413 |
| C | -7.174564 | -0.510478 | 0.308296  |
| C | -8.513912 | -0.827850 | 0.236727  |
| C | -9.434103 | 0.123036  | -0.206835 |
| C | -8.995923 | 1.397665  | -0.575512 |
| C | -7.650727 | 1.769609  | -0.525454 |
| N | -7.127178 | 3.005090  | -0.884656 |
| C | -7.844959 | 4.036588  | -1.278287 |
| N | -7.054779 | 5.153647  | -1.665647 |
| C | -6.844940 | 6.123496  | -0.772456 |
| C | -7.290906 | 6.088888  | 0.581628  |
| C | -7.010477 | 7.129483  | 1.438293  |
| C | -6.281676 | 8.236414  | 0.999050  |
| C | -5.832030 | 8.294618  | -0.322119 |
| C | -6.106135 | 7.266397  | -1.193422 |

|   |            |           |           |
|---|------------|-----------|-----------|
| O | -9.082371  | 4.174009  | -1.425382 |
| H | -2.366260  | 3.951313  | -0.496889 |
| H | -0.136371  | 3.050652  | 0.132466  |
| H | 0.120712   | 0.743999  | 0.939956  |
| H | -1.868985  | -0.760657 | 1.149051  |
| H | -6.461042  | -1.248708 | 0.652770  |
| H | -8.845616  | -1.819085 | 0.525542  |
| H | -10.488391 | -0.119486 | -0.268551 |
| H | -9.707034  | 2.134979  | -0.917685 |
| H | -5.290683  | 2.997818  | -0.613860 |
| H | -7.854703  | 5.232921  | 0.930404  |
| H | -7.357107  | 7.088745  | 2.464137  |
| H | -6.066096  | 9.048339  | 1.681821  |
| H | -5.266480  | 9.154169  | -0.661309 |
| H | -5.766529  | 7.297509  | -2.221409 |

**PUBO-F in the  $S_0$  state**

E = -1189.58578863

|   |           |           |           |
|---|-----------|-----------|-----------|
| C | -1.785578 | 2.220610  | -0.083038 |
| C | -0.607690 | 1.512130  | -0.275736 |
| C | -0.605908 | 0.124277  | -0.461419 |
| C | -1.784165 | -0.615371 | -0.460359 |
| C | -2.939772 | 0.110309  | -0.266517 |
| C | -2.968491 | 1.491028  | -0.080945 |
| N | -4.288501 | 1.878477  | 0.080504  |
| C | -4.983440 | 0.784156  | -0.003719 |
| O | -4.229287 | -0.339186 | -0.216738 |
| C | -6.416325 | 0.618802  | 0.105412  |
| C | -6.942703 | -0.679939 | 0.086143  |
| C | -8.298949 | -0.909490 | 0.181242  |
| C | -9.157029 | 0.178810  | 0.309685  |
| C | -8.667502 | 1.470629  | 0.338709  |
| C | -7.293721 | 1.729104  | 0.228299  |
| N | -6.780892 | 3.012687  | 0.281901  |
| C | -7.462413 | 4.198259  | 0.019543  |
| N | -6.702174 | 5.283743  | 0.302781  |
| C | -7.039922 | 6.613569  | 0.057056  |
| C | -8.133902 | 7.042271  | -0.706144 |
| C | -8.356797 | 8.399918  | -0.901631 |
| C | -7.510644 | 9.355978  | -0.356222 |
| C | -6.420109 | 8.933584  | 0.397709  |
| C | -6.184988 | 7.584941  | 0.601966  |
| O | -8.611692 | 4.217868  | -0.422718 |
| H | -1.789380 | 3.293079  | 0.065452  |



|   |            |           |           |
|---|------------|-----------|-----------|
| H | 0.336047   | 2.043898  | -0.283368 |
| H | 0.336772   | -0.388364 | -0.608795 |
| H | -1.791779  | -1.688129 | -0.602463 |
| H | -6.259596  | -1.514026 | -0.004442 |
| H | -8.684305  | -1.920973 | 0.162626  |
| H | -10.225426 | 0.020433  | 0.400066  |
| H | -9.344322  | 2.303564  | 0.442140  |
| H | -5.766433  | 3.075232  | 0.378104  |
| H | -5.768202  | 5.133955  | 0.856387  |
| H | -8.804771  | 6.313938  | -1.133702 |
| H | -9.210130  | 8.709034  | -1.495255 |
| H | -7.695944  | 10.411563 | -0.514811 |
| H | -5.743994  | 9.661511  | 0.832103  |
| H | -5.334252  | 7.252304  | 1.185592  |
| F | -4.572915  | 4.986664  | 1.572105  |

### 3. Vibrational Frequencies

#### PUBO in the $S_0$ state

| mode | wave number<br>$\text{cm}^{-1}$ | IR intensity<br>$\text{km/mol}$ | selection rules<br>IR |
|------|---------------------------------|---------------------------------|-----------------------|
| 1    | 3.0082                          | 5.1805                          | YES                   |
| 2    | 22.8655                         | 0.1395                          | YES                   |
| 3    | 40.0857                         | 0.5667                          | YES                   |
| 4    | 41.6316                         | 0.5813                          | YES                   |
| 5    | 54.3335                         | 12.1249                         | YES                   |
| 6    | 60.9191                         | 1.2466                          | YES                   |
| 7    | 78.4151                         | 1.0315                          | YES                   |
| 8    | 112.7978                        | 0.685                           | YES                   |
| 9    | 152.0119                        | 2.2297                          | YES                   |
| 10   | 180.6448                        | 12.8878                         | YES                   |
| 11   | 216.532                         | 4.006                           | YES                   |
| 12   | 234.8153                        | 2.3065                          | YES                   |
| 13   | 244.933                         | 0.1166                          | YES                   |
| 14   | 254.0576                        | 0.2413                          | YES                   |
| 15   | 285.2296                        | 5.584                           | YES                   |
| 16   | 325.0289                        | 0.3038                          | YES                   |
| 17   | 332.3896                        | 2.538                           | YES                   |
| 18   | 372.7321                        | 13.9826                         | YES                   |
| 19   | 413.5821                        | 0.0522                          | YES                   |
| 20   | 418.89                          | 4.3498                          | YES                   |
| 21   | 418.9718                        | 5.9429                          | YES                   |
| 22   | 452.8112                        | 5.2988                          | YES                   |

|    |          |          |     |
|----|----------|----------|-----|
| 23 | 496.2591 | 53.1359  | YES |
| 24 | 515.537  | 0.2048   | YES |
| 25 | 527.978  | 51.5421  | YES |
| 26 | 533.69   | 13.4685  | YES |
| 27 | 535.2076 | 0.1408   | YES |
| 28 | 566.6309 | 2.4826   | YES |
| 29 | 576.2883 | 3.7524   | YES |
| 30 | 622.8521 | 4.0739   | YES |
| 31 | 630.1178 | 1.9532   | YES |
| 32 | 632.9129 | 0.3203   | YES |
| 33 | 641.433  | 2.8442   | YES |
| 34 | 648.3683 | 7.0686   | YES |
| 35 | 666.76   | 0.0153   | YES |
| 36 | 698.6382 | 1.6561   | YES |
| 37 | 704.7993 | 76.2081  | YES |
| 38 | 722.7412 | 119.0752 | YES |
| 39 | 750.2096 | 152.367  | YES |
| 40 | 754.4345 | 234.8994 | YES |
| 41 | 758.6404 | 99.0285  | YES |
| 42 | 771.6219 | 9.12     | YES |
| 43 | 802.7114 | 18.8535  | YES |
| 44 | 820.9454 | 8.4166   | YES |
| 45 | 845.0628 | 0.1333   | YES |
| 46 | 845.1895 | 40.3975  | YES |
| 47 | 849.7865 | 0.0991   | YES |
| 48 | 872.101  | 2.6769   | YES |
| 49 | 898.2118 | 11.9091  | YES |
| 50 | 911.7391 | 15.1461  | YES |
| 51 | 912.7624 | 0.6628   | YES |
| 52 | 942.59   | 4.9261   | YES |
| 53 | 953.6559 | 0.1846   | YES |
| 54 | 959.7135 | 17.5298  | YES |
| 55 | 960.6292 | 3.2396   | YES |
| 56 | 961.4798 | 0.0091   | YES |
| 57 | 974.7815 | 0.0332   | YES |
| 58 | 975.067  | 1.0086   | YES |
| 59 | 1014.329 | 3.2164   | YES |
| 60 | 1027.866 | 20.7382  | YES |
| 61 | 1046.21  | 12.7643  | YES |
| 62 | 1058.658 | 54.4133  | YES |
| 63 | 1069.79  | 30.7316  | YES |
| 64 | 1080.972 | 37.6065  | YES |
| 65 | 1114.772 | 24.4779  | YES |
| 66 | 1127.498 | 15.8309  | YES |

|     |          |          |     |
|-----|----------|----------|-----|
| 67  | 1155.637 | 8.847    | YES |
| 68  | 1164.464 | 3.3357   | YES |
| 69  | 1172.611 | 1.5521   | YES |
| 70  | 1178.161 | 61.0218  | YES |
| 71  | 1199.364 | 36.723   | YES |
| 72  | 1218.276 | 50.4574  | YES |
| 73  | 1239.336 | 570.9495 | YES |
| 74  | 1261.964 | 542.3667 | YES |
| 75  | 1278.895 | 112.0256 | YES |
| 76  | 1288.348 | 239.7607 | YES |
| 77  | 1302.417 | 159.5153 | YES |
| 78  | 1315.538 | 92.297   | YES |
| 79  | 1335.261 | 639.9441 | YES |
| 80  | 1349.483 | 85.5242  | YES |
| 81  | 1369.339 | 14.4688  | YES |
| 82  | 1371.823 | 48.1703  | YES |
| 83  | 1397.177 | 4.9108   | YES |
| 84  | 1470.056 | 276.6635 | YES |
| 85  | 1474.262 | 219.3594 | YES |
| 86  | 1482.727 | 78.1885  | YES |
| 87  | 1509.023 | 187.0808 | YES |
| 88  | 1511.531 | 127.8675 | YES |
| 89  | 1530.922 | 205.4125 | YES |
| 90  | 1570.235 | 685.2495 | YES |
| 91  | 1578.387 | 561.1927 | YES |
| 92  | 1592.266 | 243.5525 | YES |
| 93  | 1639.007 | 605.9729 | YES |
| 94  | 1647.148 | 52.8616  | YES |
| 95  | 1649.715 | 123.3917 | YES |
| 96  | 1653.447 | 28.9116  | YES |
| 97  | 1664.998 | 32.3086  | YES |
| 98  | 1671.357 | 266.1402 | YES |
| 99  | 1731.84  | 344.5315 | YES |
| 100 | 3184.699 | 6.7397   | YES |
| 101 | 3190.775 | 3.4928   | YES |
| 102 | 3196.702 | 5.0787   | YES |
| 103 | 3198.016 | 2.4131   | YES |
| 104 | 3198.837 | 18.7864  | YES |
| 105 | 3209.199 | 5.0812   | YES |
| 106 | 3211.421 | 14.2474  | YES |
| 107 | 3212.094 | 7.9156   | YES |
| 108 | 3218.284 | 6.6981   | YES |
| 109 | 3225.625 | 4.6891   | YES |
| 110 | 3225.755 | 4.43     | YES |

|     |          |          |     |
|-----|----------|----------|-----|
| 111 | 3258.875 | 5.9135   | YES |
| 112 | 3266.123 | 12.9813  | YES |
| 113 | 3302.333 | 738.6529 | YES |
| 114 | 3614.946 | 87.3295  | YES |

**PUBO in the S<sub>1</sub> state**

| mode | wave number<br>cm <sup>-1</sup> | IR intensity<br>km/mol | selection rules<br>IR |
|------|---------------------------------|------------------------|-----------------------|
| 1    | 16.9274                         | 2.4285                 | YES                   |
| 2    | 30.2917                         | 1.8191                 | YES                   |
| 3    | 40.6864                         | 0.8707                 | YES                   |
| 4    | 46.9367                         | 1.0589                 | YES                   |
| 5    | 55.9168                         | 1.7527                 | YES                   |
| 6    | 80.8972                         | 15.9793                | YES                   |
| 7    | 93.9443                         | 0.4191                 | YES                   |
| 8    | 114.0071                        | 1.6558                 | YES                   |
| 9    | 140.5845                        | 3.7224                 | YES                   |
| 10   | 176.6203                        | 99.6533                | YES                   |
| 11   | 210.3818                        | 88.6764                | YES                   |
| 12   | 216.9521                        | 3.6545                 | YES                   |
| 13   | 240.838                         | 1.2748                 | YES                   |
| 14   | 258.6501                        | 1.2581                 | YES                   |
| 15   | 286.6152                        | 96.5594                | YES                   |
| 16   | 302.6432                        | 0.3181                 | YES                   |
| 17   | 331.4618                        | 13.5528                | YES                   |
| 18   | 369.0316                        | 38.8706                | YES                   |
| 19   | 399.3139                        | 0.0169                 | YES                   |
| 20   | 402.1132                        | 0.1872                 | YES                   |
| 21   | 413.8698                        | 6.94                   | YES                   |
| 22   | 417.9137                        | 6.4277                 | YES                   |
| 23   | 466.704                         | 0.1323                 | YES                   |
| 24   | 475.7177                        | 6.6306                 | YES                   |
| 25   | 486.179                         | 13.5639                | YES                   |
| 26   | 508.7427                        | 4266.25                | YES                   |
| 27   | 542.4118                        | 2.5762                 | YES                   |
| 28   | 552.8516                        | 11.365                 | YES                   |
| 29   | 561.174                         | 206.0087               | YES                   |
| 30   | 571.7923                        | 40.1433                | YES                   |
| 31   | 592.5343                        | 74.6277                | YES                   |
| 32   | 620.6394                        | 61.3922                | YES                   |
| 33   | 622.3167                        | 41.1115                | YES                   |
| 34   | 626.5274                        | 896.4185               | YES                   |
| 35   | 632.8294                        | 0.9231                 | YES                   |
| 36   | 638.6667                        | 74.0096                | YES                   |

|    |          |          |     |
|----|----------|----------|-----|
| 37 | 669.2359 | 1361.913 | YES |
| 38 | 713.0603 | 59.6784  | YES |
| 39 | 725.8057 | 70.2893  | YES |
| 40 | 727.4326 | 201.7093 | YES |
| 41 | 747.6413 | 179.9781 | YES |
| 42 | 785.403  | 1404.513 | YES |
| 43 | 804.327  | 0.4635   | YES |
| 44 | 812.5292 | 0.1058   | YES |
| 45 | 813.728  | 241.2081 | YES |
| 46 | 833.7631 | 0.4857   | YES |
| 47 | 838.9526 | 643.6463 | YES |
| 48 | 869.2307 | 122.3948 | YES |
| 49 | 879.639  | 1016.877 | YES |
| 50 | 885.1736 | 2.7791   | YES |
| 51 | 904.65   | 0.353    | YES |
| 52 | 908.5589 | 837.63   | YES |
| 53 | 913.4977 | 5.1438   | YES |
| 54 | 917.2126 | 42.3757  | YES |
| 55 | 923.1679 | 0.316    | YES |
| 56 | 941.5446 | 1.4711   | YES |
| 57 | 963.2206 | 1.2533   | YES |
| 58 | 972.5527 | 20985.05 | YES |
| 59 | 983.3648 | 0.004    | YES |
| 60 | 1017.512 | 1888.308 | YES |
| 61 | 1024.436 | 708.9024 | YES |
| 62 | 1033.45  | 203.5651 | YES |
| 63 | 1044.57  | 1126.983 | YES |
| 64 | 1048.97  | 452.1518 | YES |
| 65 | 1060.794 | 6351.275 | YES |
| 66 | 1116.318 | 65.8649  | YES |
| 67 | 1118.578 | 59.8184  | YES |
| 68 | 1140.155 | 39.5668  | YES |
| 69 | 1158.803 | 197.299  | YES |
| 70 | 1167.369 | 298.164  | YES |
| 71 | 1174.485 | 2.4824   | YES |
| 72 | 1200.306 | 168.4559 | YES |
| 73 | 1202.472 | 25.5019  | YES |
| 74 | 1239.267 | 1150.749 | YES |
| 75 | 1261.89  | 1770.038 | YES |
| 76 | 1283.137 | 50.7763  | YES |
| 77 | 1295.512 | 233.8609 | YES |
| 78 | 1316.238 | 1925.536 | YES |
| 79 | 1317.277 | 212.8144 | YES |
| 80 | 1352.894 | 1591.888 | YES |

|     |          |          |     |
|-----|----------|----------|-----|
| 81  | 1359.441 | 1369.368 | YES |
| 82  | 1382.086 | 25.7458  | YES |
| 83  | 1403.939 | 337.4869 | YES |
| 84  | 1438.812 | 513.3578 | YES |
| 85  | 1446.03  | 3112.996 | YES |
| 86  | 1470.354 | 30.2813  | YES |
| 87  | 1483.187 | 1069.299 | YES |
| 88  | 1499.271 | 54.7888  | YES |
| 89  | 1512.312 | 10.917   | YES |
| 90  | 1527.39  | 131.7134 | YES |
| 91  | 1548.885 | 1094.337 | YES |
| 92  | 1571.103 | 204.5667 | YES |
| 93  | 1590.484 | 69.3706  | YES |
| 94  | 1601.122 | 747.2299 | YES |
| 95  | 1612.845 | 2291.02  | YES |
| 96  | 1631.636 | 813.0244 | YES |
| 97  | 1638.425 | 409.841  | YES |
| 98  | 1672.904 | 95.5391  | YES |
| 99  | 1741.469 | 716.1084 | YES |
| 100 | 3009.135 | 652.4145 | YES |
| 101 | 3189.506 | 25.0754  | YES |
| 102 | 3194.016 | 54.227   | YES |
| 103 | 3197.202 | 1.3789   | YES |
| 104 | 3202.906 | 88.1388  | YES |
| 105 | 3204.619 | 8.4221   | YES |
| 106 | 3210.718 | 10.6178  | YES |
| 107 | 3212.188 | 12.0564  | YES |
| 108 | 3216.389 | 17.9333  | YES |
| 109 | 3219.036 | 79.3022  | YES |
| 110 | 3220.269 | 308.4371 | YES |
| 111 | 3224.48  | 47.611   | YES |
| 112 | 3257.902 | 26.5356  | YES |
| 113 | 3265.354 | 56.0889  | YES |
| 114 | 3586.785 | 504.6081 | YES |

**PUBO-e in the S<sub>1</sub> state**

| mode | wave number<br>cm <sup>-1</sup> | IR intensity<br>km/mol | selection rules<br>IR |
|------|---------------------------------|------------------------|-----------------------|
| 1    | 13.8228                         | 4.0112                 | YES                   |
| 2    | 21.3759                         | 0.7801                 | YES                   |
| 3    | 29.4488                         | 2.4608                 | YES                   |
| 4    | 48.7911                         | 2.4637                 | YES                   |
| 5    | 52.5777                         | 2.6203                 | YES                   |
| 6    | 62.597                          | 5.9771                 | YES                   |

|    |          |          |     |
|----|----------|----------|-----|
| 7  | 94.0133  | 3.3625   | YES |
| 8  | 106.7666 | 8.721    | YES |
| 9  | 150.3116 | 4.106    | YES |
| 10 | 176.6122 | 1.8961   | YES |
| 11 | 210.2694 | 0.6195   | YES |
| 12 | 225.0701 | 0.5991   | YES |
| 13 | 233.916  | 2.5822   | YES |
| 14 | 254.3603 | 6.7444   | YES |
| 15 | 283.8423 | 19.6336  | YES |
| 16 | 310.3703 | 1.2378   | YES |
| 17 | 326.1877 | 70.4649  | YES |
| 18 | 364.8893 | 0.6654   | YES |
| 19 | 389.0158 | 4.209    | YES |
| 20 | 404.0491 | 0.1824   | YES |
| 21 | 411.991  | 84.1313  | YES |
| 22 | 420.2835 | 40.0433  | YES |
| 23 | 473.2719 | 14.641   | YES |
| 24 | 481.6881 | 5.4352   | YES |
| 25 | 484.6431 | 5.5024   | YES |
| 26 | 497.9946 | 77.8718  | YES |
| 27 | 520.6476 | 689.335  | YES |
| 28 | 543.9025 | 312.2958 | YES |
| 29 | 571.6792 | 15.6453  | YES |
| 30 | 590.4165 | 58.6001  | YES |
| 31 | 598.2803 | 7.7136   | YES |
| 32 | 605.2366 | 13.4737  | YES |
| 33 | 622.7303 | 8.9054   | YES |
| 34 | 629.3752 | 55.7928  | YES |
| 35 | 633.2486 | 42.375   | YES |
| 36 | 635.8255 | 11.3844  | YES |
| 37 | 657.1567 | 151.5681 | YES |
| 38 | 679.6291 | 45.6945  | YES |
| 39 | 725.69   | 104.7438 | YES |
| 40 | 734.5681 | 125.648  | YES |
| 41 | 739.0745 | 207.7215 | YES |
| 42 | 749.8167 | 278.2451 | YES |
| 43 | 798.6677 | 393.9523 | YES |
| 44 | 813.6607 | 60.8127  | YES |
| 45 | 821.3471 | 0.2809   | YES |
| 46 | 827.438  | 57.6462  | YES |
| 47 | 834.7272 | 2.048    | YES |
| 48 | 834.9587 | 132.1581 | YES |
| 49 | 889.4072 | 97.5216  | YES |
| 50 | 891.0694 | 23.3025  | YES |

|    |          |          |     |
|----|----------|----------|-----|
| 51 | 901.6053 | 4.754    | YES |
| 52 | 901.6597 | 313.6208 | YES |
| 53 | 905.5524 | 6.5614   | YES |
| 54 | 912.0624 | 21.3373  | YES |
| 55 | 932.9559 | 0.5679   | YES |
| 56 | 936.3281 | 5.4156   | YES |
| 57 | 960.3535 | 1.6256   | YES |
| 58 | 978.5585 | 15.8536  | YES |
| 59 | 991.3044 | 4236.53  | YES |
| 60 | 1011.639 | 471.197  | YES |
| 61 | 1028.173 | 67.857   | YES |
| 62 | 1037.296 | 77.0045  | YES |
| 63 | 1049.14  | 0.2151   | YES |
| 64 | 1065.746 | 1035.346 | YES |
| 65 | 1082.532 | 3750.43  | YES |
| 66 | 1112.823 | 73.4339  | YES |
| 67 | 1117.546 | 8.9194   | YES |
| 68 | 1122.324 | 95.7683  | YES |
| 69 | 1163.877 | 337.6974 | YES |
| 70 | 1168.589 | 78.5561  | YES |
| 71 | 1172.214 | 2.9076   | YES |
| 72 | 1185.254 | 625.1041 | YES |
| 73 | 1199.843 | 84.7175  | YES |
| 74 | 1218.402 | 343.3372 | YES |
| 75 | 1250.877 | 481.842  | YES |
| 76 | 1267.511 | 291.3936 | YES |
| 77 | 1280.925 | 87.916   | YES |
| 78 | 1298.548 | 292.4843 | YES |
| 79 | 1328.986 | 2.1504   | YES |
| 80 | 1335.2   | 153.8904 | YES |
| 81 | 1351.777 | 145.892  | YES |
| 82 | 1363.507 | 987.9518 | YES |
| 83 | 1381.952 | 14.1393  | YES |
| 84 | 1426.147 | 40.777   | YES |
| 85 | 1448.152 | 195.8002 | YES |
| 86 | 1449.151 | 364.4388 | YES |
| 87 | 1465.741 | 6.3775   | YES |
| 88 | 1490.004 | 102.8109 | YES |
| 89 | 1505.216 | 88.1324  | YES |
| 90 | 1516.784 | 252.8094 | YES |
| 91 | 1530.878 | 281.8679 | YES |
| 92 | 1553.009 | 516.6165 | YES |
| 93 | 1563.108 | 142.8783 | YES |
| 94 | 1591.101 | 508.2744 | YES |



|     |          |          |     |
|-----|----------|----------|-----|
| 95  | 1606.945 | 45.5638  | YES |
| 96  | 1633.657 | 633.8251 | YES |
| 97  | 1642.812 | 181.5483 | YES |
| 98  | 1650.167 | 233.7941 | YES |
| 99  | 1659.34  | 97.0331  | YES |
| 100 | 3193.21  | 2.2603   | YES |
| 101 | 3194.105 | 12.7859  | YES |
| 102 | 3197.982 | 30.1907  | YES |
| 103 | 3198.953 | 6.4247   | YES |
| 104 | 3206.603 | 14.3096  | YES |
| 105 | 3209.396 | 49.4353  | YES |
| 106 | 3212.255 | 14.791   | YES |
| 107 | 3217.158 | 157.0498 | YES |
| 108 | 3219.156 | 27.5004  | YES |
| 109 | 3224.985 | 1.1876   | YES |
| 110 | 3227.533 | 0.7722   | YES |
| 111 | 3250.057 | 9.1594   | YES |
| 112 | 3260.175 | 33.9724  | YES |
| 113 | 3495.888 | 871.5219 | YES |
| 114 | 3604.444 | 240.0646 | YES |

**PUBO-a1 in the  $S_0$  state**

| mode | wave number<br>$\text{cm}^{-1}$ | IR intensity<br>$\text{km/mol}$ | selection rules<br>IR |
|------|---------------------------------|---------------------------------|-----------------------|
| 1    | 18.3589                         | 2.8346                          | YES                   |
| 2    | 22.7814                         | 1.2594                          | YES                   |
| 3    | 26.6476                         | 0.8142                          | YES                   |
| 4    | 46.6233                         | 1.5961                          | YES                   |
| 5    | 58.1963                         | 2.2717                          | YES                   |
| 6    | 64.0266                         | 2.4902                          | YES                   |
| 7    | 77.5076                         | 12.0241                         | YES                   |
| 8    | 120.3759                        | 6.3761                          | YES                   |
| 9    | 156.9029                        | 7.097                           | YES                   |
| 10   | 168.1192                        | 1.4467                          | YES                   |
| 11   | 211.2679                        | 2.9643                          | YES                   |
| 12   | 223.2804                        | 1.4146                          | YES                   |
| 13   | 253.0631                        | 0.7822                          | YES                   |
| 14   | 260.8348                        | 3.0689                          | YES                   |
| 15   | 272.4675                        | 20.7279                         | YES                   |
| 16   | 329.3516                        | 1.5261                          | YES                   |
| 17   | 347.8336                        | 3.9574                          | YES                   |
| 18   | 356.5103                        | 0.3099                          | YES                   |
| 19   | 412.7103                        | 0.0363                          | YES                   |
| 20   | 422.9732                        | 10.0312                         | YES                   |

|    |          |          |     |
|----|----------|----------|-----|
| 21 | 439.1994 | 28.9023  | YES |
| 22 | 478.2838 | 39.3815  | YES |
| 23 | 499.3948 | 15.704   | YES |
| 24 | 528.0408 | 8.1066   | YES |
| 25 | 536.654  | 14.9044  | YES |
| 26 | 541.4636 | 0.4361   | YES |
| 27 | 565.092  | 132.6596 | YES |
| 28 | 572.1026 | 6.8594   | YES |
| 29 | 575.516  | 6.4076   | YES |
| 30 | 603.4147 | 23.7417  | YES |
| 31 | 629.6893 | 2.0647   | YES |
| 32 | 637.3453 | 4.2029   | YES |
| 33 | 644.5583 | 21.8209  | YES |
| 34 | 685.7173 | 14.7764  | YES |
| 35 | 698.9608 | 4.1796   | YES |
| 36 | 713.3625 | 5.4789   | YES |
| 37 | 737.5617 | 64.1646  | YES |
| 38 | 743.7475 | 160.9213 | YES |
| 39 | 750.918  | 158.0249 | YES |
| 40 | 761.5355 | 255.718  | YES |
| 41 | 770.7154 | 6.4195   | YES |
| 42 | 800.0766 | 16.4424  | YES |
| 43 | 816.3736 | 47.7246  | YES |
| 44 | 840.1269 | 0.4637   | YES |
| 45 | 846.4482 | 25.8814  | YES |
| 46 | 849.3667 | 0.0365   | YES |
| 47 | 861.5521 | 11.6621  | YES |
| 48 | 884.1724 | 12.5822  | YES |
| 49 | 899.6252 | 5.4632   | YES |
| 50 | 908.9105 | 6.943    | YES |
| 51 | 933.6749 | 91.7819  | YES |
| 52 | 936.9465 | 5.6623   | YES |
| 53 | 947.4295 | 0.1587   | YES |
| 54 | 948.9197 | 0.0828   | YES |
| 55 | 955.0088 | 3.9464   | YES |
| 56 | 964.92   | 1.6274   | YES |
| 57 | 966.8268 | 0.3453   | YES |
| 58 | 1008.048 | 3.0602   | YES |
| 59 | 1025.765 | 197.659  | YES |
| 60 | 1028.082 | 19.2492  | YES |
| 61 | 1034.484 | 116.0799 | YES |
| 62 | 1051.689 | 80.8583  | YES |
| 63 | 1068.561 | 22.3781  | YES |
| 64 | 1103.816 | 30.3363  | YES |

|     |          |          |     |
|-----|----------|----------|-----|
| 65  | 1126.021 | 4.7256   | YES |
| 66  | 1150.145 | 47.15    | YES |
| 67  | 1163.106 | 7.1508   | YES |
| 68  | 1167.713 | 6.6879   | YES |
| 69  | 1173.045 | 92.902   | YES |
| 70  | 1189.446 | 66.6306  | YES |
| 71  | 1215.698 | 252.6065 | YES |
| 72  | 1233.049 | 668.0994 | YES |
| 73  | 1256.11  | 882.7812 | YES |
| 74  | 1273.393 | 66.8682  | YES |
| 75  | 1274.716 | 11.7687  | YES |
| 76  | 1293.514 | 41.8958  | YES |
| 77  | 1312.054 | 21.1444  | YES |
| 78  | 1330.826 | 792.9854 | YES |
| 79  | 1360.217 | 172.715  | YES |
| 80  | 1364.879 | 409.1014 | YES |
| 81  | 1395.85  | 881.3354 | YES |
| 82  | 1398.195 | 515.7668 | YES |
| 83  | 1445.234 | 399.1047 | YES |
| 84  | 1464.643 | 363.6039 | YES |
| 85  | 1483.878 | 127.8628 | YES |
| 86  | 1501.121 | 719.2801 | YES |
| 87  | 1509.056 | 5.0795   | YES |
| 88  | 1524.609 | 41.7117  | YES |
| 89  | 1534.585 | 131.0044 | YES |
| 90  | 1571.265 | 788.4377 | YES |
| 91  | 1595.909 | 203.4478 | YES |
| 92  | 1607.322 | 885.1739 | YES |
| 93  | 1628.497 | 111.2364 | YES |
| 94  | 1643.946 | 119.7162 | YES |
| 95  | 1651.439 | 236.8333 | YES |
| 96  | 1656.213 | 130.9243 | YES |
| 97  | 1663.552 | 23.4427  | YES |
| 98  | 3176.089 | 14.3159  | YES |
| 99  | 3178.118 | 15.154   | YES |
| 100 | 3182.393 | 5.0779   | YES |
| 101 | 3191.722 | 26.5263  | YES |
| 102 | 3193.299 | 2.5522   | YES |
| 103 | 3199.559 | 7.5872   | YES |
| 104 | 3204.615 | 7.1673   | YES |
| 105 | 3207.325 | 19.2989  | YES |
| 106 | 3213.585 | 23.6648  | YES |
| 107 | 3213.673 | 6.3766   | YES |
| 108 | 3221.679 | 5.574    | YES |

|     |          |        |     |
|-----|----------|--------|-----|
| 109 | 3224.572 | 9.2984 | YES |
| 110 | 3248.825 | 7.3946 | YES |
| 111 | 3616.525 | 62.76  | YES |

**PUBO-a2 in the S<sub>0</sub> state**

| mode | wave number<br>cm <sup>-1</sup> | IR intensity<br>km/mol | selection rules<br>IR |
|------|---------------------------------|------------------------|-----------------------|
| 1    | 18.7119                         | 0.1693                 | YES                   |
| 2    | 24.1439                         | 1.0629                 | YES                   |
| 3    | 41.0581                         | 0.8997                 | YES                   |
| 4    | 44.7523                         | 5.0401                 | YES                   |
| 5    | 61.8892                         | 0.3186                 | YES                   |
| 6    | 71.2344                         | 4.2006                 | YES                   |
| 7    | 100.281                         | 1.3951                 | YES                   |
| 8    | 112.2235                        | 2.1735                 | YES                   |
| 9    | 149.2225                        | 1.609                  | YES                   |
| 10   | 179.5923                        | 10.1195                | YES                   |
| 11   | 219.6881                        | 7.5798                 | YES                   |
| 12   | 232.6552                        | 0.0642                 | YES                   |
| 13   | 253.0069                        | 0.3742                 | YES                   |
| 14   | 263.8026                        | 2.1028                 | YES                   |
| 15   | 284.0719                        | 1.1896                 | YES                   |
| 16   | 325.7547                        | 0.4802                 | YES                   |
| 17   | 333.568                         | 3.1366                 | YES                   |
| 18   | 381.2898                        | 38.4263                | YES                   |
| 19   | 415.0608                        | 3.4411                 | YES                   |
| 20   | 419.0792                        | 4.1334                 | YES                   |
| 21   | 422.0993                        | 0.048                  | YES                   |
| 22   | 452.53                          | 7.2307                 | YES                   |
| 23   | 510.7511                        | 17.4983                | YES                   |
| 24   | 517.0276                        | 7.103                  | YES                   |
| 25   | 531.773                         | 11.0465                | YES                   |
| 26   | 534.0757                        | 0.2193                 | YES                   |
| 27   | 565.1031                        | 0.666                  | YES                   |
| 28   | 576.323                         | 8.0903                 | YES                   |
| 29   | 626.4759                        | 3.3722                 | YES                   |
| 30   | 627.2558                        | 3.111                  | YES                   |
| 31   | 632.1575                        | 11.5663                | YES                   |
| 32   | 640.9408                        | 2.6655                 | YES                   |
| 33   | 645.196                         | 10.2819                | YES                   |
| 34   | 666.3576                        | 0.2804                 | YES                   |
| 35   | 698.418                         | 1.779                  | YES                   |
| 36   | 710.2314                        | 6.172                  | YES                   |
| 37   | 741.3079                        | 240.1664               | YES                   |

|    |          |          |     |
|----|----------|----------|-----|
| 38 | 749.8883 | 48.4609  | YES |
| 39 | 753.307  | 256.1805 | YES |
| 40 | 765.3177 | 5.929    | YES |
| 41 | 774.4617 | 57.2806  | YES |
| 42 | 798.6441 | 50.8101  | YES |
| 43 | 814.0445 | 2.5408   | YES |
| 44 | 843.8129 | 0.0188   | YES |
| 45 | 844.6272 | 29.271   | YES |
| 46 | 849.5509 | 0.098    | YES |
| 47 | 867.2763 | 3.5051   | YES |
| 48 | 887.5857 | 20.0008  | YES |
| 49 | 901.4026 | 10.1042  | YES |
| 50 | 911.0098 | 19.1331  | YES |
| 51 | 939.5491 | 5.2893   | YES |
| 52 | 946.6795 | 0.157    | YES |
| 53 | 949.7914 | 27.1788  | YES |
| 54 | 950.576  | 0.5962   | YES |
| 55 | 953.2901 | 2.2003   | YES |
| 56 | 967.9633 | 1.1559   | YES |
| 57 | 968.7872 | 0.4867   | YES |
| 58 | 998.5518 | 206.2611 | YES |
| 59 | 1021.505 | 153.0341 | YES |
| 60 | 1027.904 | 23.6275  | YES |
| 61 | 1045.971 | 10.6668  | YES |
| 62 | 1056.637 | 78.8481  | YES |
| 63 | 1069.728 | 78.0442  | YES |
| 64 | 1093.357 | 47.4922  | YES |
| 65 | 1126.279 | 22.9909  | YES |
| 66 | 1149.526 | 48.5734  | YES |
| 67 | 1163.487 | 5.1236   | YES |
| 68 | 1164.276 | 1.9465   | YES |
| 69 | 1172.518 | 135.2751 | YES |
| 70 | 1175.763 | 34.3551  | YES |
| 71 | 1217.065 | 148.0449 | YES |
| 72 | 1225.378 | 485.5675 | YES |
| 73 | 1262.948 | 110.762  | YES |
| 74 | 1274.556 | 784.6861 | YES |
| 75 | 1291.215 | 734.8433 | YES |
| 76 | 1308.27  | 523.5166 | YES |
| 77 | 1312.419 | 130.2566 | YES |
| 78 | 1318.959 | 632.8074 | YES |
| 79 | 1346.951 | 0.3592   | YES |
| 80 | 1371.727 | 37.663   | YES |
| 81 | 1391.652 | 970.3152 | YES |

|     |          |          |     |
|-----|----------|----------|-----|
| 82  | 1398.31  | 155.9223 | YES |
| 83  | 1468.134 | 93.7625  | YES |
| 84  | 1478.057 | 23.2618  | YES |
| 85  | 1481.734 | 96.7757  | YES |
| 86  | 1491.277 | 159.6066 | YES |
| 87  | 1507.357 | 541.2326 | YES |
| 88  | 1511.549 | 99.8966  | YES |
| 89  | 1547.478 | 147.5931 | YES |
| 90  | 1575.527 | 804.1772 | YES |
| 91  | 1595.782 | 259.7478 | YES |
| 92  | 1601.185 | 427.2258 | YES |
| 93  | 1620.421 | 886.0665 | YES |
| 94  | 1646.948 | 11.22    | YES |
| 95  | 1654.021 | 340.7231 | YES |
| 96  | 1661.558 | 78.251   | YES |
| 97  | 1666.125 | 30.83    | YES |
| 98  | 3167.619 | 21.6306  | YES |
| 99  | 3171.904 | 12.5148  | YES |
| 100 | 3185.456 | 40.3155  | YES |
| 101 | 3188.339 | 10.5765  | YES |
| 102 | 3196.242 | 2.5257   | YES |
| 103 | 3200.074 | 28.7193  | YES |
| 104 | 3207.535 | 5.4462   | YES |
| 105 | 3207.65  | 9.2937   | YES |
| 106 | 3216.594 | 7.8187   | YES |
| 107 | 3222.501 | 9.4075   | YES |
| 108 | 3223.715 | 4.2197   | YES |
| 109 | 3242.942 | 4.0246   | YES |
| 110 | 3255.15  | 21.7319  | YES |
| 111 | 3447.675 | 393.6521 | YES |

**PUBO-a2 in the S<sub>1</sub> state**

| mode | wave number<br>cm <sup>-1</sup> | IR intensity<br>km/mol | selection rules<br>IR |
|------|---------------------------------|------------------------|-----------------------|
| 1    | 17.4165                         | 3.8786                 | YES                   |
| 2    | 27.7067                         | 4.1252                 | YES                   |
| 3    | 35.579                          | 0.3559                 | YES                   |
| 4    | 53.4871                         | 0.6591                 | YES                   |
| 5    | 56.4945                         | 2.0666                 | YES                   |
| 6    | 86.3573                         | 1.2023                 | YES                   |
| 7    | 91.1773                         | 3.595                  | YES                   |
| 8    | 123.4555                        | 7.7097                 | YES                   |
| 9    | 152.3619                        | 2.6906                 | YES                   |
| 10   | 158.9538                        | 1.012                  | YES                   |

|    |          |          |     |
|----|----------|----------|-----|
| 11 | 199.5117 | 4.1061   | YES |
| 12 | 229.3085 | 1.1913   | YES |
| 13 | 249.9286 | 0.1099   | YES |
| 14 | 256.9764 | 0.4082   | YES |
| 15 | 273.4851 | 10.6015  | YES |
| 16 | 306.9327 | 1.4348   | YES |
| 17 | 329.2663 | 2.3443   | YES |
| 18 | 394.786  | 13.9292  | YES |
| 19 | 401.5295 | 0.0977   | YES |
| 20 | 410.7414 | 15.7735  | YES |
| 21 | 420.4141 | 9.4212   | YES |
| 22 | 449.6264 | 9.0074   | YES |
| 23 | 481.3349 | 0.4715   | YES |
| 24 | 482.8028 | 4.5253   | YES |
| 25 | 514.3635 | 2.8513   | YES |
| 26 | 538.0637 | 16.7775  | YES |
| 27 | 556.7701 | 0.4046   | YES |
| 28 | 562.4805 | 2.2213   | YES |
| 29 | 571.5299 | 4.1303   | YES |
| 30 | 590.301  | 33.8844  | YES |
| 31 | 609.9982 | 6.07     | YES |
| 32 | 618.8051 | 19.0614  | YES |
| 33 | 620.6788 | 28.278   | YES |
| 34 | 635.2756 | 1.4866   | YES |
| 35 | 640.5257 | 0.0068   | YES |
| 36 | 666.2383 | 16.2916  | YES |
| 37 | 703.2948 | 19.7747  | YES |
| 38 | 709.0523 | 132.8894 | YES |
| 39 | 726.2267 | 172.8564 | YES |
| 40 | 743.1405 | 167.7709 | YES |
| 41 | 791.6299 | 36.0778  | YES |
| 42 | 796.1975 | 2.0312   | YES |
| 43 | 810.4334 | 0.4825   | YES |
| 44 | 820.579  | 12.2097  | YES |
| 45 | 823.527  | 76.9228  | YES |
| 46 | 831.0142 | 36.8643  | YES |
| 47 | 858.4079 | 43.4989  | YES |
| 48 | 874.8519 | 96.8745  | YES |
| 49 | 876.7532 | 10.4958  | YES |
| 50 | 882.8618 | 11.5226  | YES |
| 51 | 911.0495 | 11.3748  | YES |
| 52 | 911.7231 | 7.8421   | YES |
| 53 | 911.9435 | 16.0075  | YES |
| 54 | 918.6826 | 0.1415   | YES |

|    |          |          |     |
|----|----------|----------|-----|
| 55 | 937.1005 | 0.2846   | YES |
| 56 | 974.6315 | 5.5483   | YES |
| 57 | 988.386  | 25.8968  | YES |
| 58 | 989.571  | 18.4761  | YES |
| 59 | 1021.286 | 91.5427  | YES |
| 60 | 1024.657 | 62.3399  | YES |
| 61 | 1028.298 | 477.6457 | YES |
| 62 | 1038.128 | 18.4654  | YES |
| 63 | 1049.918 | 71.7674  | YES |
| 64 | 1110.944 | 33.8677  | YES |
| 65 | 1111.724 | 35.2348  | YES |
| 66 | 1128.083 | 83.9879  | YES |
| 67 | 1160.61  | 21.8683  | YES |
| 68 | 1162.483 | 6.2485   | YES |
| 69 | 1169.123 | 2.9625   | YES |
| 70 | 1181.895 | 24.7851  | YES |
| 71 | 1196.758 | 221.328  | YES |
| 72 | 1210.507 | 155.9826 | YES |
| 73 | 1253.213 | 161.682  | YES |
| 74 | 1272.428 | 310.977  | YES |
| 75 | 1284.238 | 574.4389 | YES |
| 76 | 1314.167 | 528.0527 | YES |
| 77 | 1319.458 | 190.7867 | YES |
| 78 | 1329.819 | 636.6684 | YES |
| 79 | 1359.483 | 16.8476  | YES |
| 80 | 1365.7   | 20.0441  | YES |
| 81 | 1395.842 | 130.1924 | YES |
| 82 | 1410.972 | 99.9867  | YES |
| 83 | 1441.456 | 333.8363 | YES |
| 84 | 1475.831 | 13.6058  | YES |
| 85 | 1482.114 | 490.5373 | YES |
| 86 | 1487.143 | 19.4404  | YES |
| 87 | 1493     | 20.364   | YES |
| 88 | 1493.56  | 28.3241  | YES |
| 89 | 1532.34  | 284.5981 | YES |
| 90 | 1569.906 | 518.0976 | YES |
| 91 | 1576.009 | 1.6362   | YES |
| 92 | 1599.783 | 1155.929 | YES |
| 93 | 1615.558 | 127.2765 | YES |
| 94 | 1624.078 | 342.6248 | YES |
| 95 | 1643.288 | 280.0746 | YES |
| 96 | 1651.759 | 242.2155 | YES |
| 97 | 1666.807 | 393.9179 | YES |
| 98 | 3177.648 | 31.4811  | YES |



|     |          |         |     |
|-----|----------|---------|-----|
| 99  | 3181.946 | 27.5192 | YES |
| 100 | 3198.472 | 4.5623  | YES |
| 101 | 3200.963 | 57.2832 | YES |
| 102 | 3202.124 | 760.594 | YES |
| 103 | 3204.741 | 27.9811 | YES |
| 104 | 3205.573 | 82.8303 | YES |
| 105 | 3205.785 | 21.9176 | YES |
| 106 | 3213.1   | 0.0762  | YES |
| 107 | 3213.573 | 16.5884 | YES |
| 108 | 3215.319 | 3.0408  | YES |
| 109 | 3219.349 | 7.8206  | YES |
| 110 | 3225.418 | 11.5525 | YES |
| 111 | 3239.677 | 1.0884  | YES |

**PUBO-a2e in the S<sub>1</sub> state**

| mode | wave number<br>cm <sup>-1</sup> | IR intensity<br>km/mol | selection rules<br>IR |
|------|---------------------------------|------------------------|-----------------------|
| 1    | 17.4902                         | 2.7383                 | YES                   |
| 2    | 28.2362                         | 2.6643                 | YES                   |
| 3    | 43.2632                         | 1.5254                 | YES                   |
| 4    | 48.2463                         | 0.6059                 | YES                   |
| 5    | 60.5793                         | 3.0724                 | YES                   |
| 6    | 81.883                          | 13.9534                | YES                   |
| 7    | 103.307                         | 4.3989                 | YES                   |
| 8    | 121.4018                        | 2.0566                 | YES                   |
| 9    | 148.8253                        | 6.9991                 | YES                   |
| 10   | 167.0013                        | 7.0214                 | YES                   |
| 11   | 207.9587                        | 2.721                  | YES                   |
| 12   | 225.9604                        | 1.7186                 | YES                   |
| 13   | 253.2249                        | 1.6075                 | YES                   |
| 14   | 256.7394                        | 39.1036                | YES                   |
| 15   | 272.9213                        | 14.3943                | YES                   |
| 16   | 317.3885                        | 4.5155                 | YES                   |
| 17   | 327.7057                        | 8.461                  | YES                   |
| 18   | 390.3717                        | 0.4253                 | YES                   |
| 19   | 399.9876                        | 21.413                 | YES                   |
| 20   | 407.2053                        | 12.9877                | YES                   |
| 21   | 422.9471                        | 5.4431                 | YES                   |
| 22   | 453.0684                        | 2.3007                 | YES                   |
| 23   | 477.7227                        | 1.3819                 | YES                   |
| 24   | 480.1667                        | 5.1138                 | YES                   |
| 25   | 496.1854                        | 4.6693                 | YES                   |
| 26   | 525.7042                        | 19.4738                | YES                   |
| 27   | 541.9213                        | 61.7775                | YES                   |

|    |          |          |     |
|----|----------|----------|-----|
| 28 | 554.4828 | 18.8099  | YES |
| 29 | 571.4686 | 10.7234  | YES |
| 30 | 589.9334 | 17.825   | YES |
| 31 | 595.1578 | 13.9145  | YES |
| 32 | 614.2471 | 2.0033   | YES |
| 33 | 629.4829 | 35.5298  | YES |
| 34 | 634.2944 | 7.4725   | YES |
| 35 | 646.8533 | 15.7458  | YES |
| 36 | 661.8564 | 24.3174  | YES |
| 37 | 705.5394 | 39.1676  | YES |
| 38 | 724.366  | 22.3073  | YES |
| 39 | 729.8112 | 391.1164 | YES |
| 40 | 740.0775 | 42.4758  | YES |
| 41 | 745.1453 | 159.0131 | YES |
| 42 | 800.8242 | 26.2958  | YES |
| 43 | 812.897  | 2.6746   | YES |
| 44 | 817.7494 | 0.2939   | YES |
| 45 | 820.0025 | 10.6622  | YES |
| 46 | 822.5202 | 4.9428   | YES |
| 47 | 853.4273 | 35.0072  | YES |
| 48 | 875.8951 | 21.0202  | YES |
| 49 | 882.2544 | 6.9247   | YES |
| 50 | 885.5167 | 73.9133  | YES |
| 51 | 892.7214 | 4.0877   | YES |
| 52 | 900.4148 | 0.7318   | YES |
| 53 | 913.2867 | 19.5448  | YES |
| 54 | 926.2563 | 0.4906   | YES |
| 55 | 931.7485 | 0.2338   | YES |
| 56 | 968.9446 | 8.3875   | YES |
| 57 | 981.4361 | 0.5413   | YES |
| 58 | 986.5698 | 56.7458  | YES |
| 59 | 1010.174 | 62.937   | YES |
| 60 | 1023.155 | 37.6238  | YES |
| 61 | 1031.525 | 171.3771 | YES |
| 62 | 1038.538 | 14.6326  | YES |
| 63 | 1056.213 | 50.8659  | YES |
| 64 | 1107.04  | 26.1539  | YES |
| 65 | 1110.949 | 24.063   | YES |
| 66 | 1122.213 | 109.7816 | YES |
| 67 | 1149.852 | 181.3924 | YES |
| 68 | 1163.358 | 46.3904  | YES |
| 69 | 1166.784 | 2.9825   | YES |
| 70 | 1169.189 | 84.6059  | YES |
| 71 | 1177.43  | 11.0114  | YES |

|     |          |          |     |
|-----|----------|----------|-----|
| 72  | 1213.684 | 107.5181 | YES |
| 73  | 1219.004 | 92.1559  | YES |
| 74  | 1264.978 | 21.6005  | YES |
| 75  | 1276.414 | 263.7348 | YES |
| 76  | 1317.487 | 32.8148  | YES |
| 77  | 1318.637 | 100.95   | YES |
| 78  | 1334.196 | 342.3325 | YES |
| 79  | 1347.973 | 305.0836 | YES |
| 80  | 1350.175 | 252.4003 | YES |
| 81  | 1364.263 | 57.1986  | YES |
| 82  | 1388.589 | 1072.631 | YES |
| 83  | 1428.039 | 14.8915  | YES |
| 84  | 1446.907 | 356.9529 | YES |
| 85  | 1475.987 | 10.4884  | YES |
| 86  | 1480.123 | 262.8557 | YES |
| 87  | 1490.324 | 30.8898  | YES |
| 88  | 1495.927 | 146.8221 | YES |
| 89  | 1501.174 | 260.7104 | YES |
| 90  | 1544.558 | 304.2855 | YES |
| 91  | 1563.739 | 2397.101 | YES |
| 92  | 1578.83  | 5.5406   | YES |
| 93  | 1598.417 | 499.4397 | YES |
| 94  | 1611.339 | 69.7187  | YES |
| 95  | 1614.382 | 47.2637  | YES |
| 96  | 1649.883 | 455.0862 | YES |
| 97  | 1661.625 | 0.8407   | YES |
| 98  | 3177.499 | 10.5433  | YES |
| 99  | 3193.747 | 23.626   | YES |
| 100 | 3193.79  | 11.6004  | YES |
| 101 | 3193.948 | 10.8151  | YES |
| 102 | 3198.126 | 4.184    | YES |
| 103 | 3206.204 | 21.2194  | YES |
| 104 | 3208.45  | 17.3969  | YES |
| 105 | 3210.579 | 8.2284   | YES |
| 106 | 3213.896 | 11.3948  | YES |
| 107 | 3220.249 | 18.3944  | YES |
| 108 | 3221.734 | 7.6025   | YES |
| 109 | 3229.033 | 0.5293   | YES |
| 110 | 3236.292 | 10.7936  | YES |
| 111 | 3241.53  | 1272.194 | YES |

**PUBO-F in the S<sub>0</sub> state**

| mode | wave number<br>cm <sup>-1</sup> | IR intensity<br>km/mol | selection rules<br>IR |
|------|---------------------------------|------------------------|-----------------------|
|------|---------------------------------|------------------------|-----------------------|

|    |          |          |     |
|----|----------|----------|-----|
| 1  | 18.8288  | 3.9469   | YES |
| 2  | 27.5576  | 1.4928   | YES |
| 3  | 32.0756  | 2.1054   | YES |
| 4  | 47.5516  | 2.2879   | YES |
| 5  | 56.4703  | 2.5383   | YES |
| 6  | 64.9937  | 3.5212   | YES |
| 7  | 81.7503  | 7.2044   | YES |
| 8  | 97.2324  | 13.5045  | YES |
| 9  | 115.5846 | 40.1762  | YES |
| 10 | 120.6522 | 7.0761   | YES |
| 11 | 143.5865 | 4.6284   | YES |
| 12 | 188.4395 | 8.4863   | YES |
| 13 | 209.5416 | 8.368    | YES |
| 14 | 243.987  | 3.4909   | YES |
| 15 | 254.6224 | 0.212    | YES |
| 16 | 256.3229 | 3.7309   | YES |
| 17 | 276.8413 | 162.7294 | YES |
| 18 | 289.2209 | 14.0094  | YES |
| 19 | 327.9017 | 1.5692   | YES |
| 20 | 337.2989 | 3.7854   | YES |
| 21 | 382.0057 | 41.2306  | YES |
| 22 | 414.4755 | 0.1327   | YES |
| 23 | 420.0421 | 3.9346   | YES |
| 24 | 424.5993 | 15.7284  | YES |
| 25 | 459.1303 | 12.1176  | YES |
| 26 | 509.4783 | 15.3909  | YES |
| 27 | 521.7436 | 12.0966  | YES |
| 28 | 534.7077 | 18.4824  | YES |
| 29 | 539.7857 | 0.1615   | YES |
| 30 | 565.9395 | 6.4867   | YES |
| 31 | 575.5299 | 1.6967   | YES |
| 32 | 628.8248 | 8.9773   | YES |
| 33 | 633.8614 | 2.2589   | YES |
| 34 | 638.4147 | 53.5032  | YES |
| 35 | 643.9672 | 16.1644  | YES |
| 36 | 649.8376 | 121.7835 | YES |
| 37 | 658.7921 | 2.5818   | YES |
| 38 | 676.227  | 5.7402   | YES |
| 39 | 698.4455 | 8.701    | YES |
| 40 | 719.6916 | 4.5206   | YES |
| 41 | 747.3025 | 75.8581  | YES |
| 42 | 756.021  | 148.8671 | YES |
| 43 | 757.8966 | 225.937  | YES |
| 44 | 765.6561 | 75.0801  | YES |

|    |          |          |     |
|----|----------|----------|-----|
| 45 | 794.8315 | 21.2798  | YES |
| 46 | 822.2021 | 71.2605  | YES |
| 47 | 845.6107 | 20.6498  | YES |
| 48 | 852.9784 | 0.0528   | YES |
| 49 | 852.9846 | 0.4087   | YES |
| 50 | 861.2754 | 3.9564   | YES |
| 51 | 902.1066 | 18.5433  | YES |
| 52 | 905.3224 | 32.1786  | YES |
| 53 | 911.0308 | 14.39    | YES |
| 54 | 944.2398 | 4.4174   | YES |
| 55 | 955.5165 | 25.7078  | YES |
| 56 | 957.7305 | 1.2218   | YES |
| 57 | 958.9976 | 0.2768   | YES |
| 58 | 960.2208 | 3.2261   | YES |
| 59 | 968.5396 | 0.4106   | YES |
| 60 | 975.8949 | 1.1806   | YES |
| 61 | 1011.582 | 24.5762  | YES |
| 62 | 1027.265 | 25.3194  | YES |
| 63 | 1038.562 | 91.7599  | YES |
| 64 | 1054.337 | 42.0351  | YES |
| 65 | 1063.532 | 77.9695  | YES |
| 66 | 1064.803 | 117.3476 | YES |
| 67 | 1077.875 | 54.804   | YES |
| 68 | 1104.445 | 13.5635  | YES |
| 69 | 1126.799 | 20.7179  | YES |
| 70 | 1156.36  | 22.0825  | YES |
| 71 | 1163.841 | 3.1006   | YES |
| 72 | 1169.986 | 2.1735   | YES |
| 73 | 1178.772 | 62.2459  | YES |
| 74 | 1187.968 | 20.8925  | YES |
| 75 | 1219.058 | 51.259   | YES |
| 76 | 1255.359 | 159.9016 | YES |
| 77 | 1264.856 | 606.9392 | YES |
| 78 | 1280.319 | 176.9832 | YES |
| 79 | 1297.411 | 1223.014 | YES |
| 80 | 1301.132 | 130.8865 | YES |
| 81 | 1314.742 | 29.6817  | YES |
| 82 | 1328.089 | 329.2259 | YES |
| 83 | 1348.277 | 69.9075  | YES |
| 84 | 1369.651 | 17.6185  | YES |
| 85 | 1372.778 | 239.991  | YES |
| 86 | 1397.401 | 8.594    | YES |
| 87 | 1471.83  | 232.0473 | YES |
| 88 | 1476.274 | 56.4818  | YES |

|     |          |          |     |
|-----|----------|----------|-----|
| 89  | 1482.274 | 89.3701  | YES |
| 90  | 1508.479 | 19.8478  | YES |
| 91  | 1511.219 | 131.2029 | YES |
| 92  | 1526.928 | 379.4759 | YES |
| 93  | 1559.142 | 534.9582 | YES |
| 94  | 1589.005 | 358.6994 | YES |
| 95  | 1610.82  | 218.9566 | YES |
| 96  | 1624.797 | 302.6494 | YES |
| 97  | 1644.698 | 332.7141 | YES |
| 98  | 1648.832 | 23.3943  | YES |
| 99  | 1662.94  | 46.5916  | YES |
| 100 | 1667.553 | 125.988  | YES |
| 101 | 1682.456 | 751.8104 | YES |
| 102 | 1730.349 | 116.4969 | YES |
| 103 | 2157.563 | 2842.457 | YES |
| 104 | 3180.506 | 2.1604   | YES |
| 105 | 3186.075 | 20.327   | YES |
| 106 | 3194.501 | 5.3506   | YES |
| 107 | 3196.958 | 2.4827   | YES |
| 108 | 3197.461 | 3.8619   | YES |
| 109 | 3206.68  | 25.203   | YES |
| 110 | 3208.186 | 6.3708   | YES |
| 111 | 3210.501 | 8.854    | YES |
| 112 | 3218.507 | 6.6428   | YES |
| 113 | 3224.659 | 7.1659   | YES |
| 114 | 3224.881 | 3.2888   | YES |
| 115 | 3254.576 | 2.711    | YES |
| 116 | 3256.901 | 3.5124   | YES |
| 117 | 3387.824 | 545.9638 | YES |
